# Supplementary material for: Thickness of the hole transport layer in perovskite solar cells: performance versus reproducibility
Source: Royal Society of Chemistry journal article supplement (doi:10.1039/c5ra18648j), 2015-01-01
Supplement: c5ra18648j1.pdf [file c5ra18648j1.pdf]

## Supporting Information

for

### ***Thickness of Hole Transport Layer in Perovskite Solar Cells: Performances versus Reproducibility***

Guan-Woo Kim, Dipak V. Shinde, and Taiho Park\*

[\*] Prof. Taiho Park. Corresponding-Author

*Chemical Engineering, Pohang University of Science and Technology (POSTECH), 77  
Cheongam-Ro, Nam-gu, Pohang, Kyungbuk, Korea. Fax: +82-54-279-8298; Tel: 82-54-  
279-2394; E-mail: [taihopark@postech.ac.kr](mailto:taihopark@postech.ac.kr)*

#### **Contents**

**Fig. S1** Cross-sectional SEM (Scanning electron microscopy) images showing various thickness of hole transport layer (HTL): (a) 700 nm HTL, (b) 560 nm HTL, (c) 450 nm HTL, (d) 400 nm HTL, (e) 250 nm HTL, (f) 180 nm HTL

**Fig. S2** Ultraviolet photoelectron spectroscopy (UPS) of spiro-MeOTAD depending on the thickness.

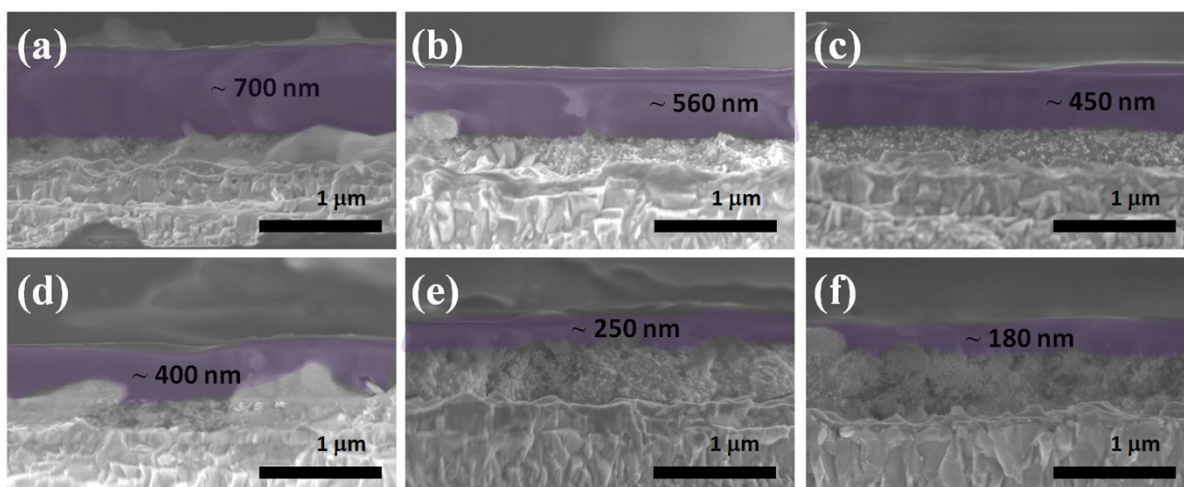

**Fig. S1** Cross-sectional SEM (Scanning electron microscopy) images showing various thickness of hole transport layer (HTL): (a) 700 nm HTL, (b) 560 nm HTL, (c) 450 nm HTL, (d) 400 nm HTL, (e) 250 nm HTL, (f) 180 nm HTL

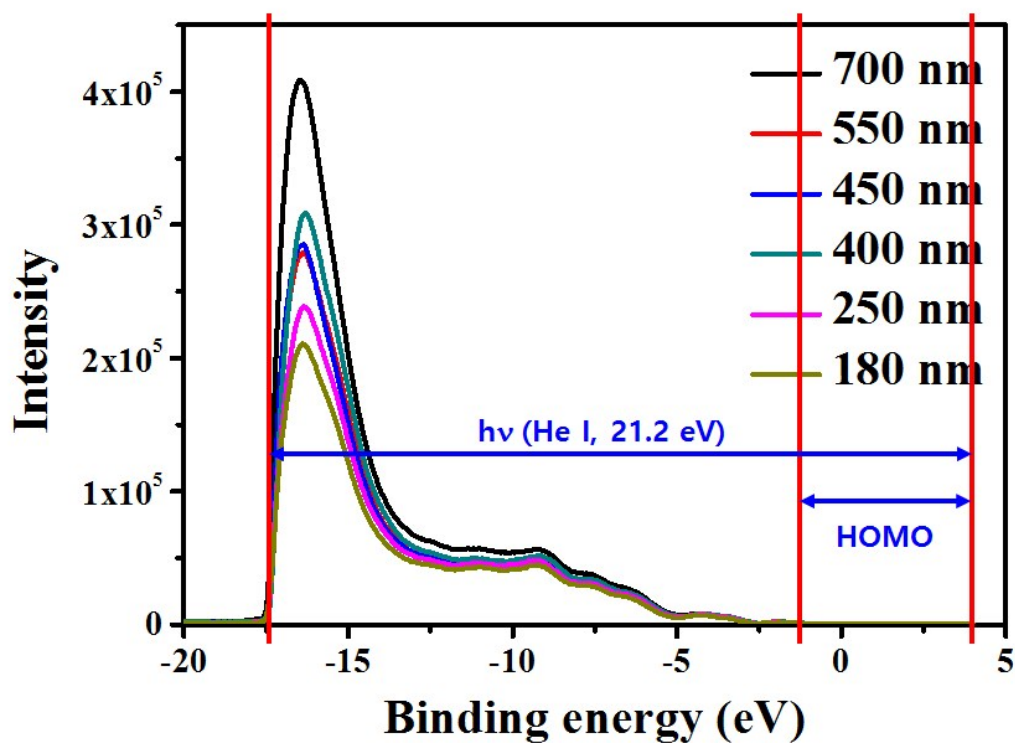

**Fig. S2** Ultraviolet photoelectron spectroscopy (UPS) of spiro-MeOTAD depending on the thickness.
